# Supplementary material for: Synthesis and characterization of biodegradable macroporous cryogels crosslinked by chitosan oligosaccharide-graft-acrylic acid
Source: Royal Society of Chemistry journal article supplement (doi:10.1039/c2sm06821d), 2012-01-01
Supplement: c2sm06821d.pdf [file c2sm06821d.pdf]

Electronic supplementary information (ESI) for

## Synthesis and characterizations of biodegradable macroporous cryogels crosslinked by chitosan oligosaccharide-graft-acrylic acid

Yujia Su,<sup>a</sup> Qian Zhao,<sup>\*a,b</sup> Jianzhong Sun,<sup>a</sup> Jingjun Wu<sup>a</sup>

<sup>a</sup>State Key Laboratory of Chemical Engineering, Department of Chemical and Biological Engineering, Zhejiang University, Hangzhou 310027, China

<sup>b</sup>Center for Biomaterial Development, Institute of Polymer Research, Helmholtz-Zentrum Geesthacht, Kantstraße 55, 14513 Teltow, Germany

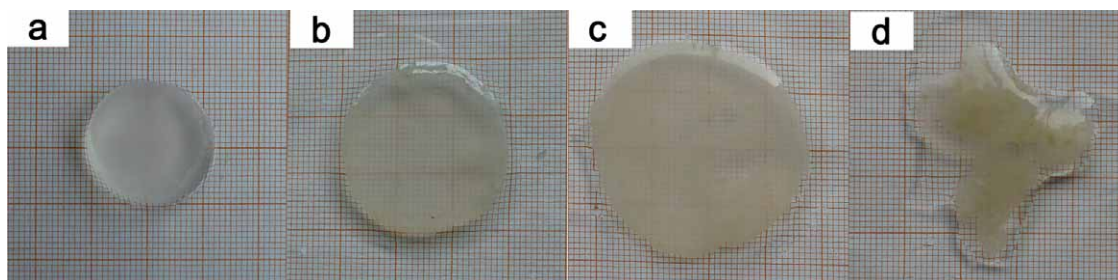

Figure S1. Appearances of the same piece of a cryogel (AA:RUCSO=1:1, the amount of CSO-g-AA is 50 mg) during the degradation process: (a) before degradation; (b) after degraded for 20 days; (c) after degraded for 40 days; (d) after degraded for 50 days.

\* Corresponding author. Tel.: +86-571-87953171; Fax: +86-571-87951612.  
E-mail address: [qianzhao@zju.edu.cn](mailto:qianzhao@zju.edu.cn)
